# Supplementary material
Source: MDPI journal article supplement (https://www.mdpi.com/2312-7481/4/4/44)
Supplement: s1 [file s1]

Article

# Closing the Circle of the Lanthanide-Murexide Series: Single-Molecule Magnet Behavior and Near-Infrared Emission of the Nd<sup>III</sup> Derivative

Gang Huang, Guillaume Calvez, Yan Suffren, Carole Daiguebonne, Stéphane Freslon, Olivier Guillou and Kevin Bernot \*

Univ Rennes, INSA Rennes, CNRS, UMR 6226 (Institut des Sciences Chimiques de Rennes), F-35000 Rennes, France; h710377768@163.com (G.H.); guillaume.calvez@insa-rennes.fr (G.C.); yan.suffren@insa-rennes.fr (Y.S.); carole.daiguebonne@insa-rennes.fr (C.D.); stephane.freslon@insa-rennes.fr (S.F.); Olivier.guillou@insa-rennes.fr (O.G.)

\* Correspondence: kevin.bernot@insa-rennes.fr; Tel.: +33-02-2323-8434

Received: 18 July 2018; Accepted: 21 September 2018; Published: date

**Keywords:** lanthanides; neodymium single-molecule magnets; near-infrared emission; bifunctionality

Supplementary

**Table S1.** Main crystallographic parameters for NdMurex.

| Formula                                    | C <sub>48</sub> H <sub>64</sub> N <sub>30</sub> Nd <sub>2</sub> O <sub>56</sub> |
|--------------------------------------------|---------------------------------------------------------------------------------|
| M [g·mol <sup>-1</sup> ]                   | 2245.77                                                                         |
| Crystal system                             | triclinic                                                                       |
| Space group                                | <i>P</i> -1( <i>N</i> <sup>o</sup> 2)                                           |
| <i>a</i> (Å)                               | 10.895(4)                                                                       |
| <i>b</i> (Å)                               | 11.095(6)                                                                       |
| <i>c</i> (Å)                               | 16.340(3)                                                                       |
| $\alpha$ [°]                               | 88.789(1)                                                                       |
| $\beta$ [°]                                | 82.016(2)                                                                       |
| $\gamma$ [°]                               | 76.973(1)                                                                       |
| <i>V</i> (Å <sup>3</sup> )                 | 1905.6(13)                                                                      |
| <i>Z</i>                                   | 1                                                                               |
| <i>T</i> (K)                               | 150                                                                             |
| 2 $\theta$ range                           | 2.03–27.490                                                                     |
| Reflns collected                           | 13625                                                                           |
| Independent reflns                         | 8692                                                                            |
| Observed reflns                            | 8246                                                                            |
| Parameters                                 | 738                                                                             |
| <i>R</i> 1/ $\omega$ <i>R</i> <sup>2</sup> | 0.0196/0.0651                                                                   |
| GofGoodness of fit                         | 1.126                                                                           |

**Table S2.** Selected bond distances and angles of NdMurex.

| Bond   | Bond Lengths (Å) | Bonds     | Angles (°) |
|--------|------------------|-----------|------------|
| Nd1-O1 | 2.4833(16)       | O5-Nd1-O4 | 74.34(6)   |
| Nd1-O2 | 2.5070(18)       | O5-Nd1-O3 | 76.64(6)   |
| Nd1-O3 | 2.4762(17)       | O4-Nd1-O3 | 118.90(5)  |
| Nd1-O4 | 2.4614(16)       | O1-Nd1-O7 | 75.32(6)   |
| Nd1-O5 | 2.4296(18)       | O2-Nd1-O6 | 91.27(5)   |
| Nd1-O6 | 2.678(2)         | O7-Nd1-O2 | 79.11(5)   |
| Nd1-O7 | 2.4985(18)       | O1-Nd1-O2 | 122.26(5)  |
| Nd1-O8 | 2.5052(15)       | O3-Nd1-O6 | 151.85(5)  |
| Nd1-N1 | 2.7440(19)       | O4-Nd1-O6 | 61.52(5)   |
| Nd1-N2 | 2.8659(19)       | O8-Nd1-O6 | 72.76(5)   |
| -      | -                | O5-Nd1-N1 | 120.02(6)  |
| -      | -                | O4-Nd1-N1 | 122.16(5)  |
| -      | -                | O3-Nd1-N2 | 59.33(5)   |
| -      | -                | N1-Nd1-N2 | 173.22(5)  |

**Table S3.** Continuous Shape Measurements (CSM) extracted from analysis of NdMurex with SHAPE [1].

| CSM Value | Capped Square Antiprism ( $C_{4v}$ ) | Spherical Capped Square Antiprism ( $C_{4d}$ ) | Spherical Tricapped Trigonal Prism ( $D_{3h}$ ) |
|-----------|--------------------------------------|------------------------------------------------|-------------------------------------------------|
| CSM       | 1.526                                | 1.732                                          | 2.208                                           |

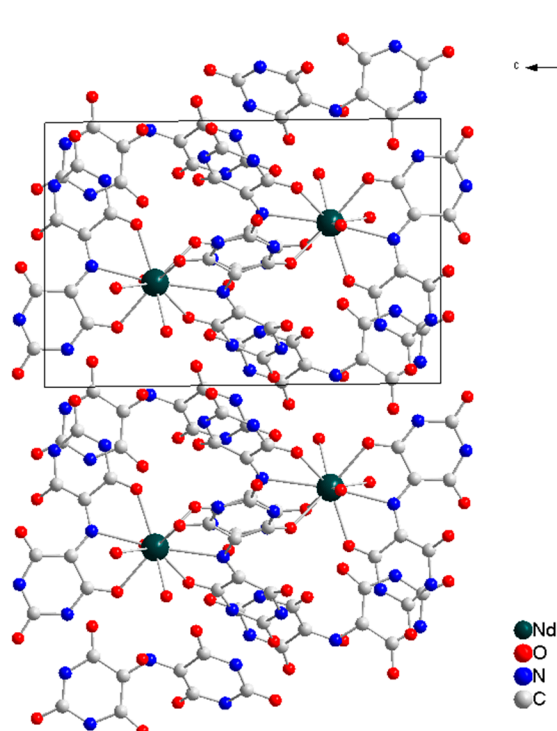**Figure S1.** Representation of the crystal packing of NdMurex along the *a* axis. Water molecules and hydrogen atoms are omitted for clarity.

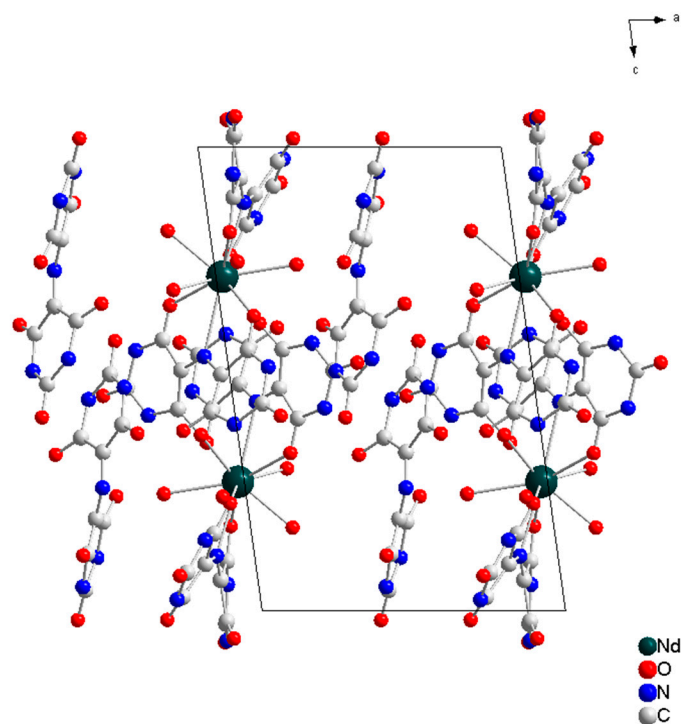

**Figure S2.** Representation of the crystal packing of NdMurex along the *b* axis. Water molecules and hydrogen atoms are omitted for clarity.

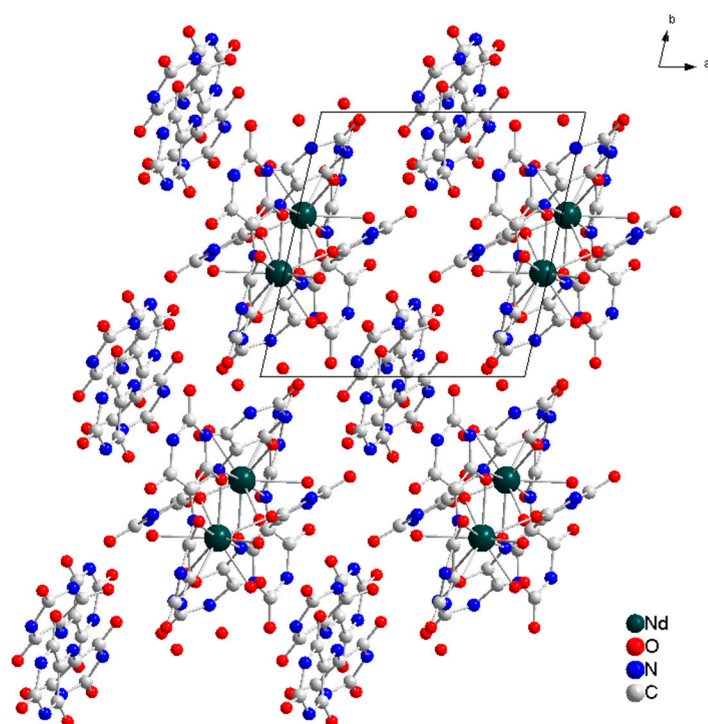

**Figure S3.** Representation of the crystal packing of NdMurex along the *c* axis. Water molecules and hydrogen atoms are omitted for clarity.

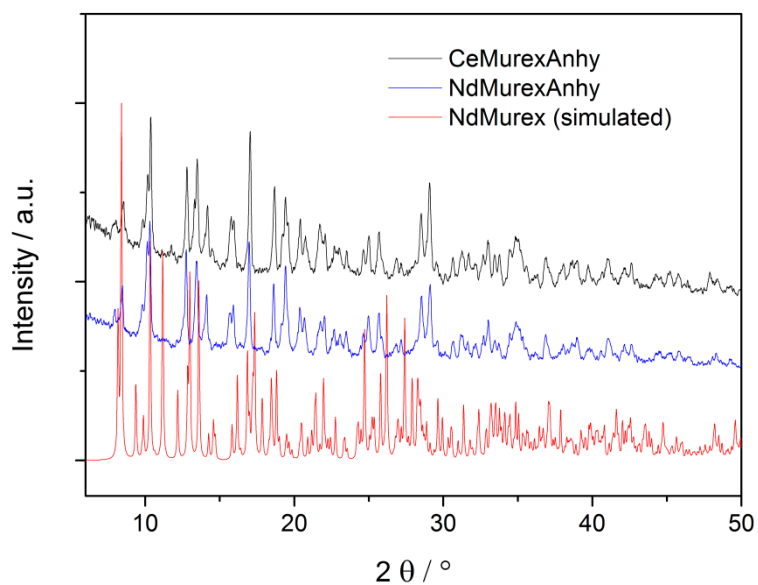

**Figure S4.** Powder X-ray diffraction pattern for NdMurexAnhy and CeMurexAnhy measured at 300 K with simulation from the structural data file of NdMurex at 150 K ( $\lambda_{\text{Cu}} = 1.5407 \text{ \AA}$ ).

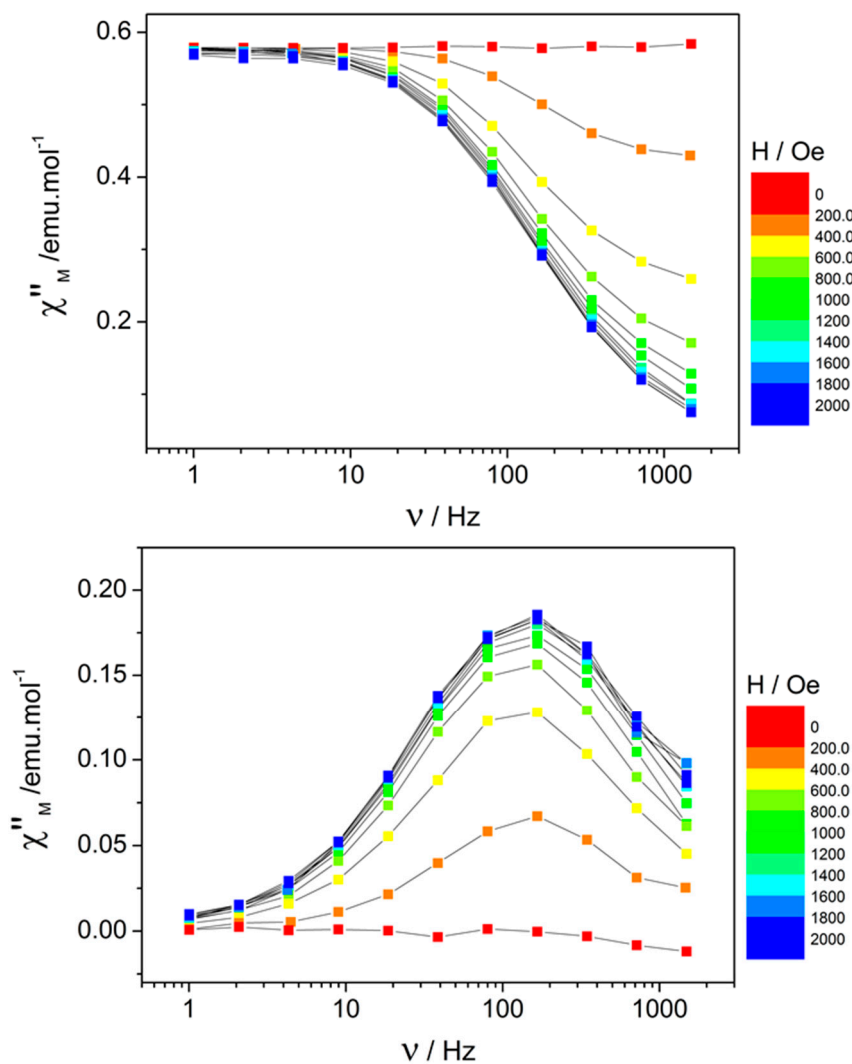

**Figure S5.** Field dependence of the in-phase (top) and out-of phase susceptibility (bottom) measured at 2 K for NdMurex.

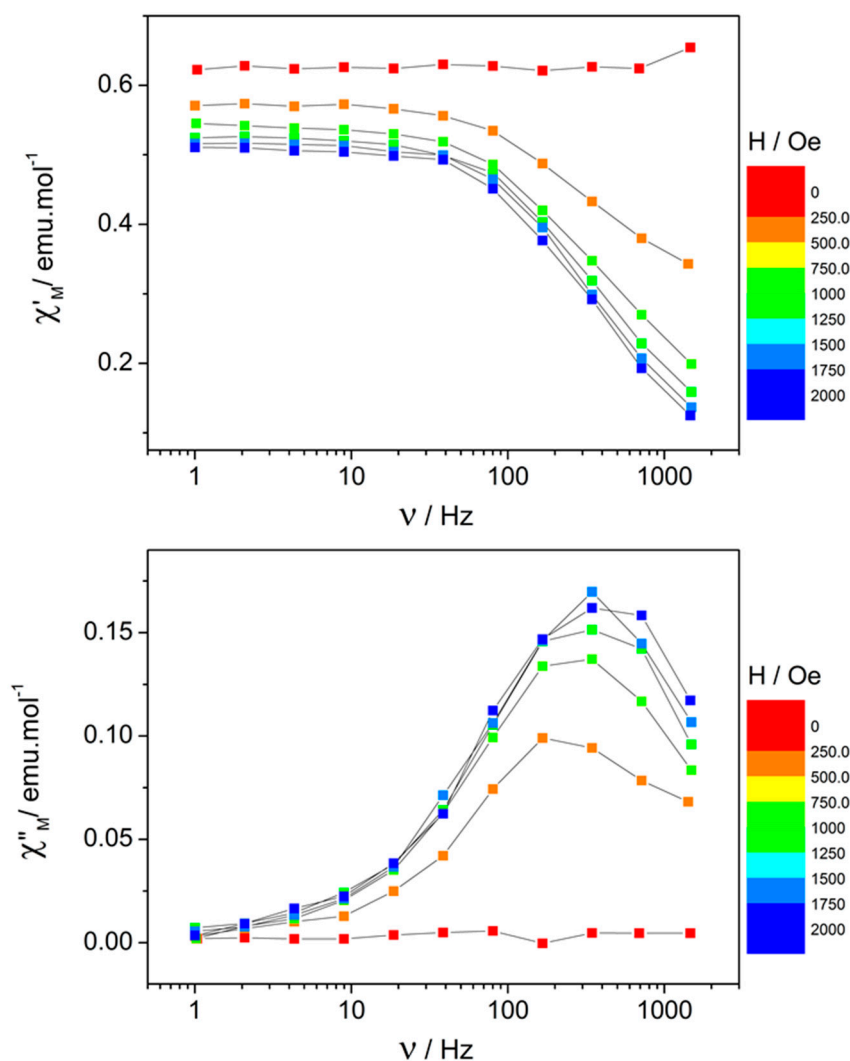

**Figure S6.** Field dependence of the in-phase (top) and out of phase susceptibility (bottom) measured at 2 K for NdMurexAnhy.

**Table S4.** Table of the values extracted from the fitting of  $X''$  vs frequency curves for NdMurex.

| T(K) | $\tau$ (s) |
|------|------------|
| 1.8  | 1343       |
| 2    | 1049       |
| 2.2  | 916        |
| 2.4  | 671        |
| 2.6  | 606        |
| 2.8  | 426        |
| 3    | 425        |
| 3.2  | 357        |
| 3.4  | 318        |
| 3.6  | 301        |
| 3.8  | 281        |
| 4    | 214        |
| 4.2  | 195        |
| 4.4  | 177        |

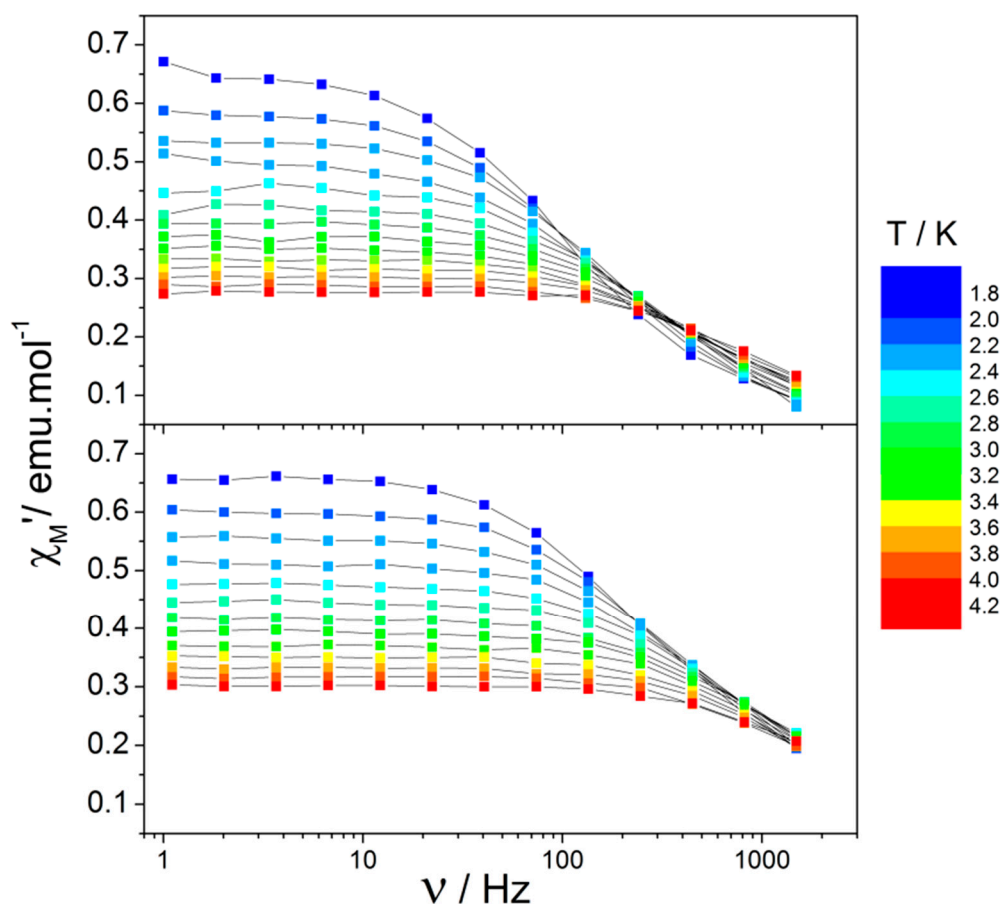

**Figure S7.** Frequency dependence of the in-phase susceptibility of NdMurex (top) and NdMurexAnhy (bottom) with  $H_{dc} = 1200$  Oe for temperatures from 1.8 (blue) to 4.4 K (red). Lines are guide to the eye.

**Table S5.** Table of the values extracted from the Argand plot for NdMurex.

| T (K) | $\chi_s$ | $\chi_T$ | $\alpha$ | R <sup>2</sup> |
|-------|----------|----------|----------|----------------|
| 1.8   | 0.057    | 0.651    | 0.22     | 0.98876        |
| 2     | 0.052    | 0.588    | 0.23     | 0.99244        |
| 2.2   | 0.055    | 0.540    | 0.21     | 0.98344        |
| 2.4   | 0.041    | 0.499    | 0.22     | 0.95589        |
| 2.6   | 0.035    | 0.463    | 0.27     | 0.93759        |
| 3.0   | 0.047    | 0.398    | 0.22     | 0.98236        |
| 3.2   | 0.045    | 0.375    | 0.21     | 0.97445        |
| 3.4   | 0.045    | 0.355    | 0.21     | 0.93707        |
| 3.6   | 0.066    | 0.335    | 0.15     | 0.98255        |
| 3.8   | 0.060    | 0.320    | 0.18     | 0.96585        |
| 4.0   | 0.056    | 0.304    | 0.16     | 0.98775        |
| 4.2   | 0.039    | 0.290    | 0.18     | 0.9872         |
| 4.4   | 0.055    | 0.278    | 0.14     | 0.95626        |

**Table S6.** Table of the values extracted from the fitting of  $X''$  vs frequency curves for NdMurexAnhy.

| T (K) | $\tau$ (s) |
|-------|------------|
| 1.8   | 608        |
| 2     | 453        |
| 2.2   | 385        |
| 2.4   | 318        |
| 2.6   | 266        |
| 2.8   | 223        |
| 3     | 176        |
| 3.2   | 158        |
| 3.4   | 143        |
| 3.6   | 120        |
| 3.8   | 112        |
| 4     | 97         |
| 4.2   | 83         |

**Table S7.** Table of the values extracted from the Argand plot for NdMurexAnhy.

| T (K) | $\chi_s$ | $\chi_T$ | $\alpha$ | R <sup>2</sup> |
|-------|----------|----------|----------|----------------|
| 1.8   | 0.131    | 0.664    | 0.21     | 0.97681        |
| 2     | 0.120    | 0.606    | 0.22     | 0.98466        |
| 2.2   | 0.124    | 0.560    | 0.20     | 0.99076        |
| 2.4   | 0.121    | 0.516    | 0.21     | 0.98224        |
| 2.6   | 0.128    | 0.479    | 0.19     | 0.99352        |
| 2.8   | 0.117    | 0.449    | 0.21     | 0.98829        |
| 3.0   | 0.103    | 0.419    | 0.22     | 0.98909        |
| 3.2   | 0.100    | 0.397    | 0.22     | 0.98529        |
| 3.4   | 0.113    | 0.372    | 0.16     | 0.97344        |
| 3.6   | 0.085    | 0.353    | 0.21     | 0.98465        |
| 3.8   | 0.094    | 0.334    | 0.17     | 0.98716        |
| 4.0   | 0.097    | 0.319    | 0.18     | 0.97325        |

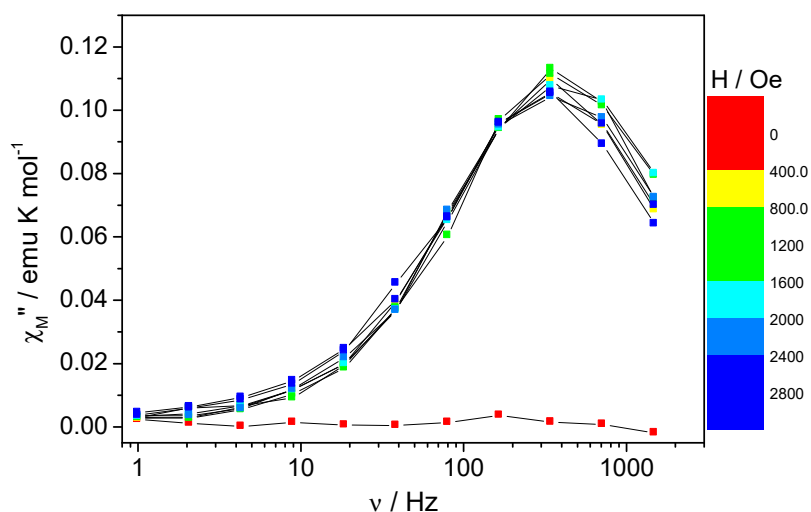**Figure S8.** Field dependence of the out-of phase susceptibility measured at 2 K for CeMurexAnhy.

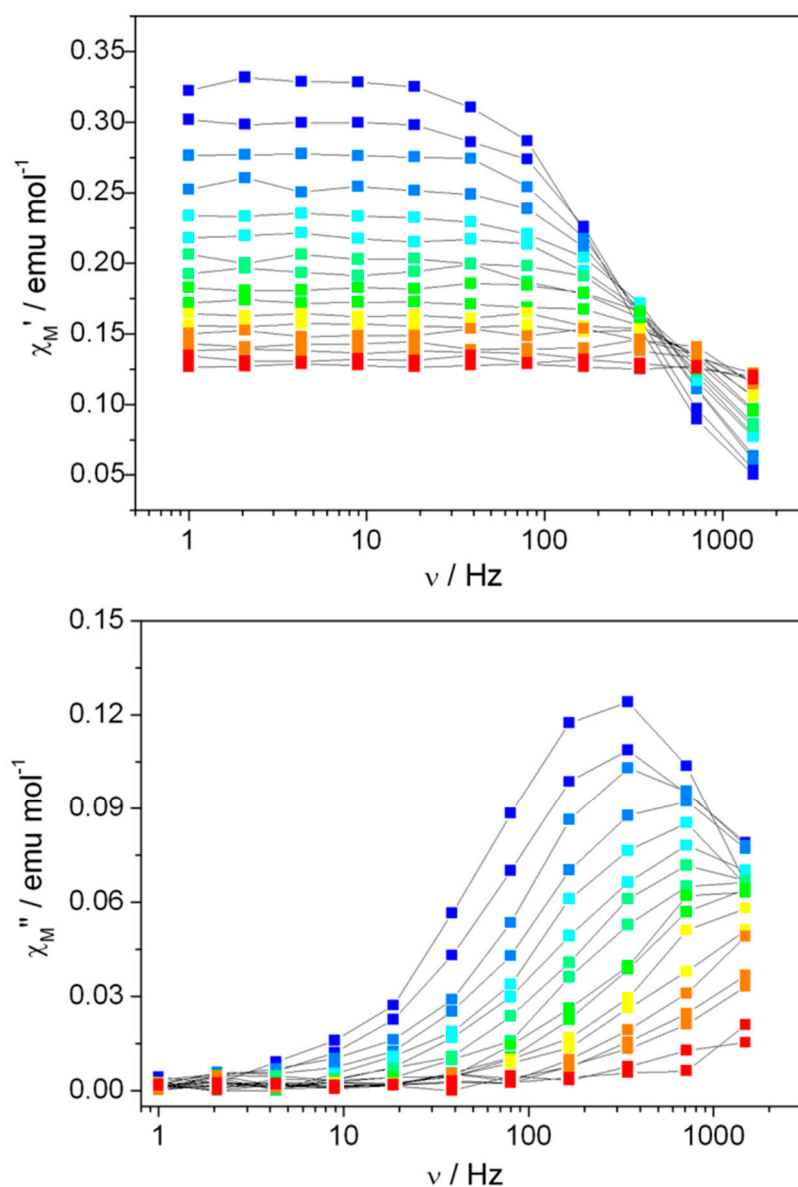

**Figure S9.** Frequency dependence of the in-phase (top) and out of phase (bottom) susceptibilities measured with  $H_{dc} = 400$  Oe for CeMurex for temperatures from 1.8 (blue) to 5 K (red).

**Table S8.** Table of the values extracted from the fitting of  $X''$  vs frequency curves for CeMurexAnhy.

| T (K) | $\tau$ (s) |
|-------|------------|
| 1.8   | 536        |
| 2     | 452        |
| 2.2   | 344        |
| 2.4   | 304        |
| 2.6   | 241        |
| 2.8   | 224        |
| 3     | 157        |
| 3.2   | 155        |
| 3.4   | 140        |
| 3.6   | 124        |
| 3.8   | 117        |



**Table S9.** Table of the values extracted from the Argand plot for CeMurexAnhy.

| <b>T (K)</b> | <b><math>\chi_s</math></b> | <b><math>\chi_T</math></b> | <b><math>\alpha</math></b> | <b><math>R^2</math></b> |
|--------------|----------------------------|----------------------------|----------------------------|-------------------------|
| 1.8          | 0.029                      | 0.342                      | 0.16                       | 0.93186                 |
| 2            | 0.013                      | 0.302                      | 0.14                       | 0.97682                 |
| 2.2          | 0.031                      | 0.281                      | 0.15                       | 0.98825                 |
| 2.4          | 0.037                      | 0.255                      | 0.12                       | 0.99574                 |
| 2.6          | 0.028                      | 0.235                      | 0.14                       | 0.99118                 |
| 2.8          | 0.039                      | 0.218                      | 0.10                       | 0.99654                 |
| 3.0          | 0.014                      | 0.206                      | 0.16                       | 0.94575                 |
| 3.2          | 0.028                      | 0.191                      | 0.11                       | 0.99889                 |

## References

1. Alvarez, S. Polyhedra in (inorganic) chemistry. *Dalton Trans.* **2005**, *13*, 2209–2233.

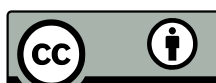

© 2018 by the authors. Submitted for possible open access publication under the terms and conditions of the Creative Commons Attribution (CC BY) license (<http://creativecommons.org/licenses/by/4.0/>).
